# Supplementary material for: Hemostasis-On-a-Chip: Impedance Spectroscopy Meets Microfluidics for Hemostasis Evaluation
Source: MDPI journal article supplement (doi:10.3390/mi10080534), 2019-08-14
Supplement: s1 [file s1]

## Supplementary Materials

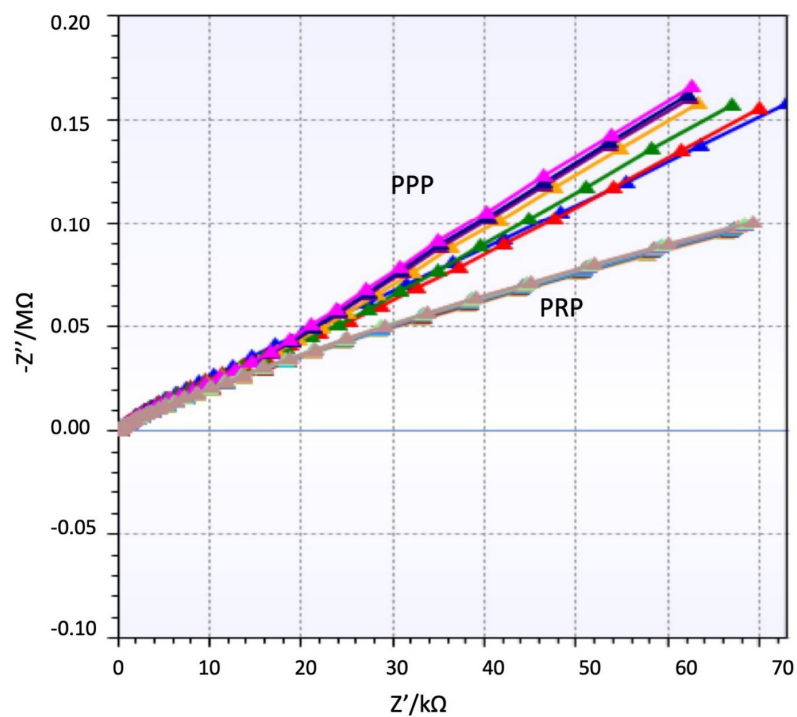

Figure S1. Real and Imaginary part of Impedance for PPP and PRP over the time.

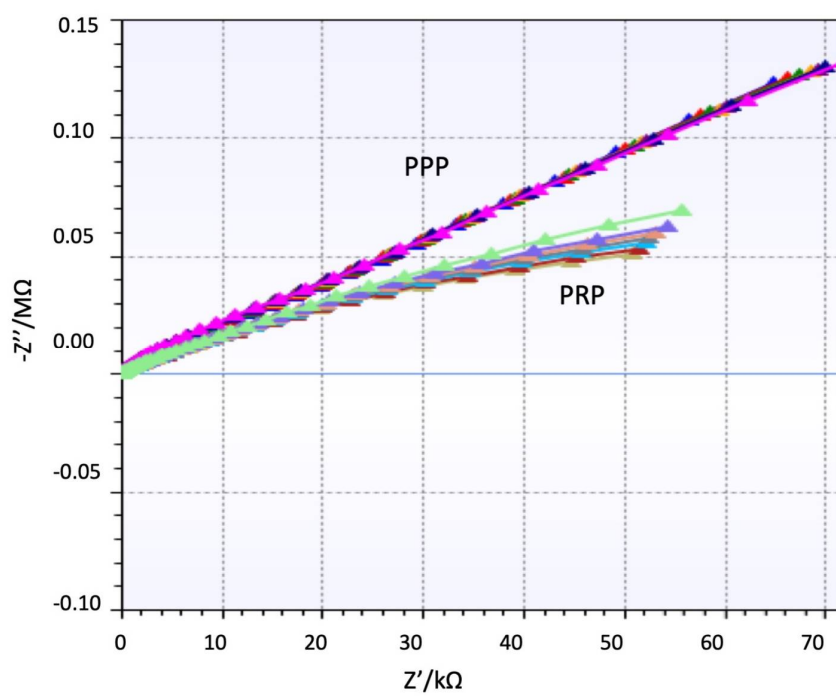

Figure S2. Real and Imaginary part of Impedance for PPP and PRP over the time
